# Supplementary material for: Enhancing the utility of unnatural amino acid synthetases by manipulating broad substrate specificity
Source: Royal Society of Chemistry journal article supplement (doi:10.1039/b904032c), 2009-05-28
Supplement: b904032c.pdf [file b904032c.pdf]

Supplemental Information

**Synthesis of 4'-fluoro-*p*-benzoyl-*DL*-phenylalanine (4F-Bpa)**

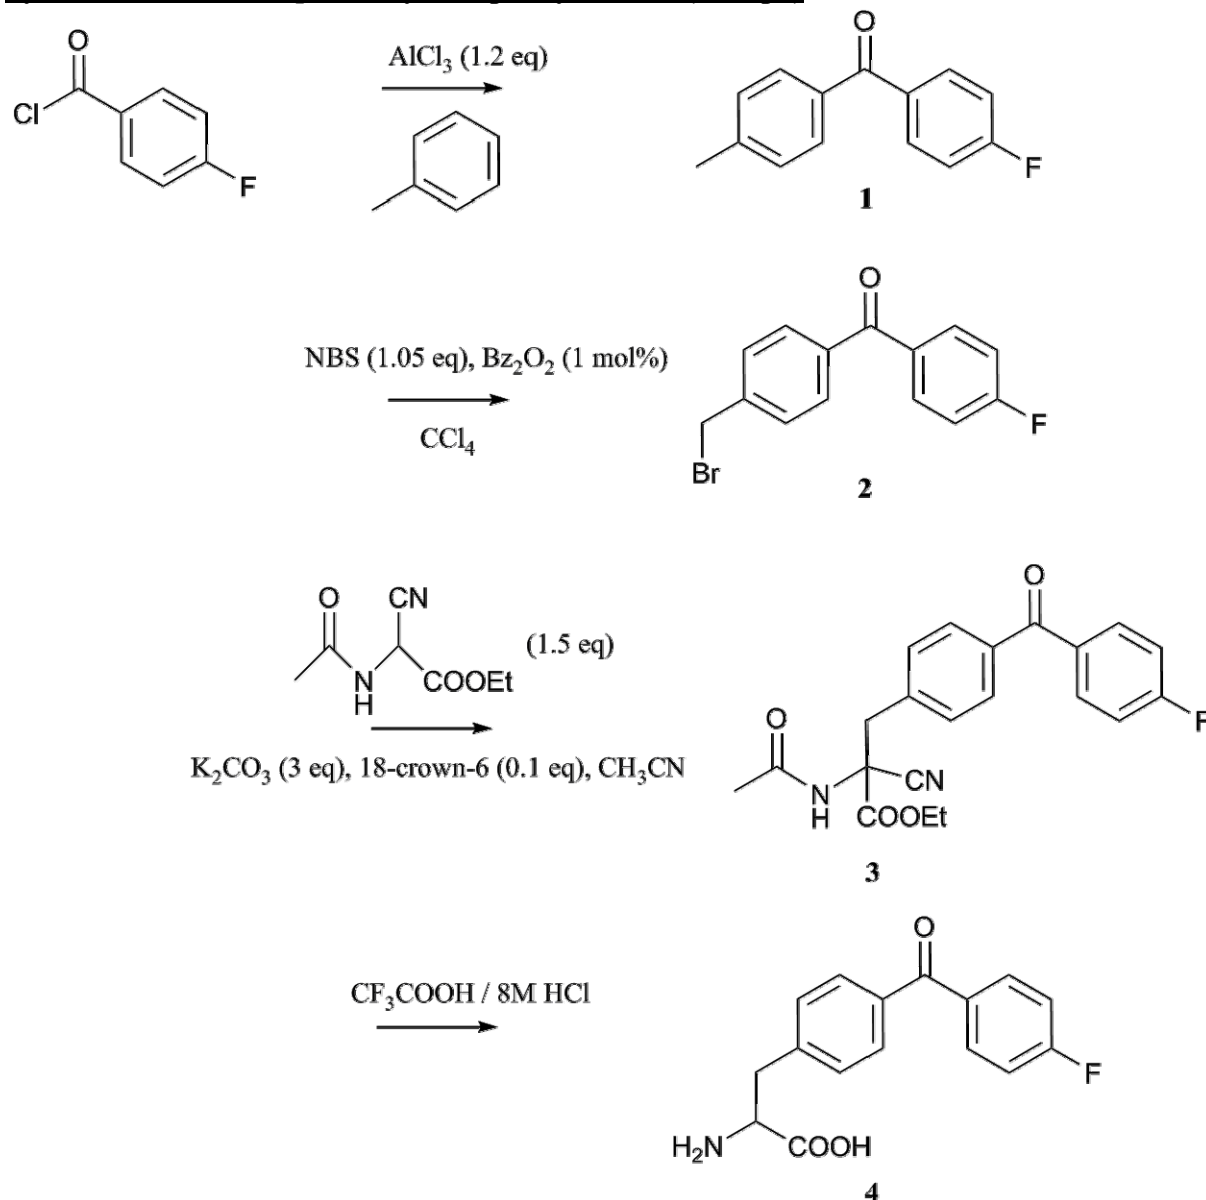

**4-methyl-4'-fluoro-benzophenone (1).** Aluminum chloride (3.74 g, 28 mmol) was slowly added to a stirred solution of 4-fluorobenzoyl chloride (3.42 g, 21.6 mmol) in toluene (60 mL). The solution was stirred at rt under argon for 1.5 h, then 5 mL of water was added dropwise to quench the reaction. The solution was further stirred for an additional 15 min before being washed with water (2 x 50 mL), 10%  $\text{NaHCO}_3$  (2 x 50 mL), and brine (2 x 50 mL). The organic phase was dried with anhydrous  $\text{MgSO}_4$ , filtered through a celite cake, and rotary evaporated, then dried under vacuum to obtain a yellow solid. The crude product was recrystallized from hexane and dried under vacuum to obtain a white solid (2.70 g, 62 % yield).  $^1\text{H NMR}(\text{CDCl}_3,$

500 MHz):  $\delta$ 7.80 (dd, aromatic, 2 H),  $\delta$ 7.67 (d, aromatic, 2 H),  $\delta$ 7.26 (d, aromatic, 2 H),  $\delta$ 7.15 (t, aromatic, 2 H),  $\delta$ 2.42 (s, methyl, 3 H).  $^{13}\text{C}$  NMR: carbonyl ( $\delta$ 195.0), aromatic ( $\delta$ 166.2, 164.2, 143.3, 134.7, 132.2, 130.1, 129.0, 115.3), alkyl ( $\delta$ 21.6).  $^{19}\text{F}$ -NMR:  $\delta$ -109.1 ppm.

**4-bromomethyl-4'-fluorobenzophenone (2).** A mixture of **1** (2.0 g, 9.9 mmol), recrystallized N-bromosuccinimide (1.524 g, 9.9 mmol), and benzoyl peroxide (170 mg) in  $\text{CCl}_4$  (20 ml) was refluxed at  $\sim 150^\circ\text{C}$  under argon for 3 h. The hot solution was filtered and rinsed with hot  $\text{CCl}_4$  (20 ml) until the crystals became colorless. The filtrate was cooled to rt and filtered again to completely remove residual succinimide. The filtrate was rotary evaporated and dried under vacuum. The crude product was recrystallized from hexane and dried under vacuum (43% yield).  $R_f = 0.25$  (hexane: EtOAc; 85:15).  $^1\text{H}$ -NMR( $\text{CDCl}_3$ , 500 MHz):  $\delta$ 7.85 (dd, aromatic, 2 H),  $\delta$ 7.75 (d, aromatic, 2 H),  $\delta$ 7.51 (d, aromatic, 2 H),  $\delta$ 7.17 (dd, aromatic, 2 H),  $\delta$ 4.52 (s, methyl, 3 H).  $^{13}\text{C}$  NMR ( $\text{CDCl}_3$ ): carbonyl ( $\delta$ 195.0), aromatic ( $\delta$ 166.5, 164.5, 142.5, 138.5, 133.4, 130.4, 129.2, 115.8, 115.5), alkyl ( $\delta$ 31.1).

**Ethyl  $\alpha$ -acetamido- $\alpha$ -cyano- $\beta$ -(4'-fluoro-4-benzophenone)-DL-propionate (3).** A mixture of **2** (600 mg, 2.13 mmol), ethyl acetamidocyanoacetate (545 mg, 3.2 mmol), 18-crown-6 (56 mg), and  $\text{K}_2\text{CO}_3$  (883 mg, 6.4 mmol) in  $\text{CH}_3\text{CN}$  (8 ml) was stirred at rt under argon for 3 h. The solution was filtered through a celite cake, concentrated, and dried under vacuum. The crude product was washed with hexane to remove brown impurities and dried under vacuum (56% yield).  $R_f = 0.15$  (hexane: EtOAc; 50:50).  $^1\text{H}$ -NMR( $\text{CDCl}_3$ , 500 MHz):  $\delta$ 7.85 (dd, aromatic, 2 H),  $\delta$ 7.75 (d, aromatic, 2 H),  $\delta$ 7.38 (d, aromatic, 2 H),  $\delta$ 7.18 (dd, aromatic, 2 H),  $\delta$ 4.25 – 4.15 (m, 2 H, methylene of ethyl ester),  $\delta$  3.60 and  $\delta$  3.50 (dd, 2 H, hydrogens on  $\text{C}_\beta$ ),  $\delta$  3.62 (s, 3 H, methyl),  $\delta$  1.22 (doublet of triplets, 3 H, ester methyl).  $^{13}\text{C}$ -NMR( $\text{CDCl}_3$ ): carbonyl ( $\delta$ 194.7, 170.5, 165.7), (137.3, 136.7, 133.4, 132.6, 132.5, 130.3, 130.1, 116.3, 115.7, 115.5, 70.0, 58.0, 22.4, 13.8).

**4'-fluoro-p-benzoyl-phenylalanine (4).** A mixture of **3** (0.40 g) and 30 ml of a 1:1 solution of 8 M HCl and  $\text{CF}_3\text{COOH}$  was refluxed with stirring at  $180^\circ\text{C}$  for 24 hours. The reaction mixture was lyophilized to collect the crude product. Lingering trifluoroacetate ion was exchanged for chloride ion by suspending the crude product in  $\sim 20$  mL 1 M HCl and lyophilizing the resulting solution. The product was dissolved in 1 M NaOH and filtered. The clear solution was adjusted to a pH of 7 by addition of 1 M HCl and the precipitate was collected and washed with cold water (2 x 10 mL). The remaining solid was dried under vacuum to obtain  $\sim 180$  mg of a white powder.  $^1\text{H}$ -NMR DMSO:  $\delta$ 7.8 (dd, aromatic, 2 H),  $\delta$ 7.6 (d, aromatic, 2 H),  $\delta$ 7.43 (d, aromatic, 2 H),  $\delta$ 7.38 (dd, aromatic, 2 H),  $\delta$ 3.44 (bs, 2 H,  $\text{NH}_2$ ),  $\delta$ 3.45 (dd, 1 H,  $\text{CHCH}_\text{A}\text{CH}_\text{B}$ ),  $\delta$ 3.25 (dd, 1 H,  $\text{CHCH}_\text{A}\text{CH}_\text{B}$ ),  $\delta$ 3.0 (m, 1 H,  $\text{CHCH}_2$ ).  $^{19}\text{F}$ -NMR:  $\delta$ -109.27 ppm. ). MS ES (cal 287.0) pos. ion 288.1, neg. ion 286.1.

#### **Synthesis of 2',6'-difluoro-p-benzoyl-DL-phenylalanine (2,6dF-Bpa)**

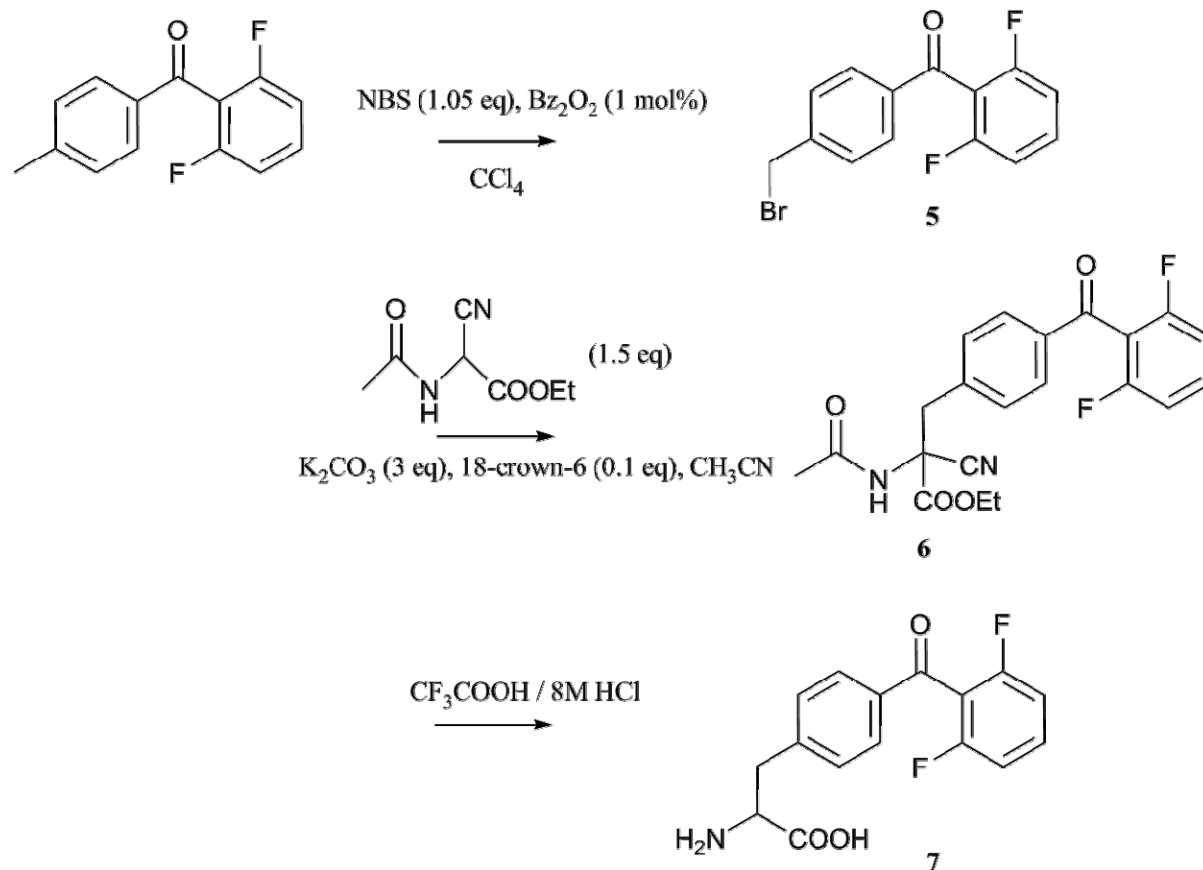

**4-bromomethyl-2',6'-difluorobenzophenone (5).** A mixture of 4-methyl-2',6'-difluorobenzophenone (233 mg, 1 mmol, Asiatech, Inc.), recrystallized N-bromosuccinimide (178 mg, 1 mmol), and benzoyl peroxide (17 mg) in CCl<sub>4</sub> (3 ml) was refluxed at ~150 °C under argon for 3 h. The hot solution was filtered and rinsed with hot CCl<sub>4</sub> (20 ml) until the crystals became colorless. The filtrate was cooled to rt and filtered again to completely remove residual succinimide. The filtrate was rotary evaporated and dried under vacuum. The crude product was purified by column chromatography on a silica gel column (13 cm X 55 mm) eluted with hexane:EtOAc (85:15) and then rotary evaporated and dried under vacuum (55% yield). R<sub>f</sub> = 0.3 (hexane:EtOAc; 85:15). <sup>1</sup>H-NMR(CDCl<sub>3</sub>, 500 MHz): δ 7.84 (d, 2 H, aromatic), δ 7.50 (d, 2 H, aromatic), δ 7.46 (t, 1 H, aromatic), δ 7.01 (m, 2 H, aromatic), δ 4.51 (s, 2 H). <sup>13</sup>C-NMR(CDCl<sub>3</sub>): carbonyl (δ 188.1), aromatic (δ 160.8, 158.8, 143.9, 136.6, 132.0, 130.0, 129.4, 111.9), alkyl bromide (δ 31.8).

**Ethyl α-acetamido-α-cyano-β-(2',4'-difluoro-4-benzophenone)-DL-propionate (6).** A mixture of 5 (172 mg, 0.55 mmol), ethyl acetamidocyanoacetate (142 mg, 0.83 mmol), 18-crown-6 (15.8 mg, 0.06 mmol), and K<sub>2</sub>CO<sub>3</sub> (231 mg, 1.67 mmol) in CH<sub>3</sub>CN (8 ml) was stirred at rt under argon for 3 h. The solution was filtered through a celite cake, concentrated, and dried under vacuum. The crude product was washed with hexane to remove brown impurities and dried under vacuum (56% yield). R<sub>f</sub> = 0.15 (hexane:EtOAc; 50:50). <sup>1</sup>H-NMR(CDCl<sub>3</sub>, 500 MHz): δ 7.83 (d, 2H, aromatic), δ 7.48 (t, 1 H, aromatic), δ 7.41 (d, 2 H, aromatic), δ 7.01 (d, 2

H, aromatic),  $\delta$  6.90 (s, 1 H, -NH), 4.30 – 4.05 (m, 2 H, methylene of ethyl ester),  $\delta$  3.60 and  $\delta$  3.50 (dd, 2 H, hydrogens on C $_{\beta}$ ),  $\delta$  2.05 (s, 3 H, methyl of ketone),  $\delta$  1.22 (doublet of triplets, 3 H, ester methyl).  $^{13}\text{C}$ -NMR(CDCl $_3$ ): carbonyl ( $\delta$  188.6, 170.1, 165.3), aromatic (160.7, 158.7, 138.4, 136.7, 132.3, 130.6, 130.0, 111.9), aromatic C-F ( $\delta$  77.0), alkyl ( $\delta$  64.0, 57.4, 41.3, 22.6, 13.7).

**2',6'-difluoro-*p*-benzoyl-phenylalanine (7).** A mixture of **6** (0.12 g) and 10 ml of a 1:1 solution of 8 M HCl and CF $_3$ COOH was refluxed with stirring at 150 °C for 24 hours. The reaction mixture was lyophilized to collect the crude product. Lingering trifluoroacetate ion was exchanged for chloride ion by suspending the crude product in ~ 20 mL 1 M HCl and lyophilizing the resulting solution. The product was dissolved in 1 M NaOH and filtered. The clear solution was adjusted to a pH of 7 by addition of 1 M HCl and the precipitate was collected by centrifugation and washed with cold water (2 x 10 mL). The remaining white solid was dried under vacuum to obtain ~ 50 mg of a white powder.  $^1\text{H}$ -NMR:  $\delta$  7.71 (d, 2 H, aromatic),  $\delta$  7.67 (t, 1 H, aromatic),  $\delta$  7.47 (d, 2 H, aromatic),  $\delta$  7.29 (t, 2 H, aromatic),  $\delta$  3.44 (dd, 3 H, NH $_3^+$ ),  $\delta$  3.31 (m, 1 H, CHCH $_2$ ),  $\delta$  3.21 (dd, 1 H, CHCH $_A$ CH $_B$ ),  $\delta$  2.95 (dd, 1 H, CHCH $_A$ CH $_B$ ).  $^{13}\text{C}$ -NMR: carbonyl ( $\delta$  188.2), carboxylic ( $\delta$  168.8), aromatic (161.2, 159.2, 157.7, 145.8, 134.4, 130.4, 129.3, 112.3), alkyl ( $\delta$  55.0). MS ES (cal 305.0) pos. ion 306.1, neg. ion 304.1.

### **Synthesis of 4'-iodo-*p*-benzoyl-*DL*-phenylalanine (4I-Bpa)**

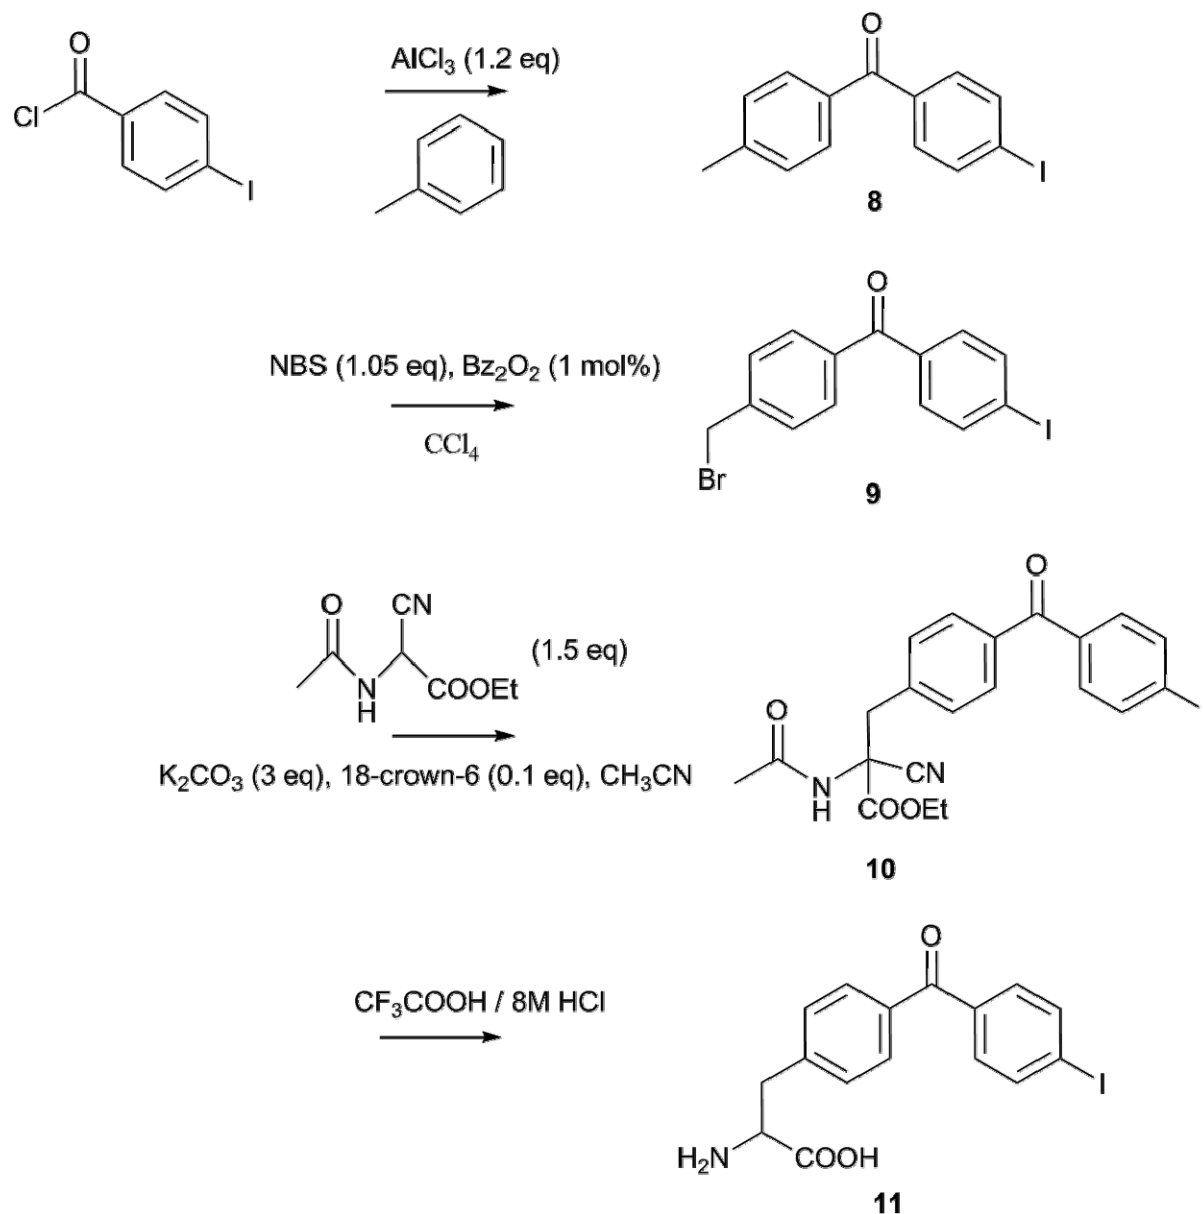

**4-methyl-4'-iodo-benzophenone (8).** Aluminum chloride (3.070 g, 23.02 mmol) was slowly added to a stirred solution of 4'-iodobenzoyl chloride (4.961 g, 18.61 mmol) in toluene (50 mL). The solution was stirred at rt under argon for 1 h, then water was added dropwise to quench the reaction. The solution was stirred for an additional 15 minutes before being washed with water (2 x 50 mL), 10%  $\text{NaHCO}_3$  (2 x 50 mL), and brine (2 x 50 mL). The organic phase was dried with anhydrous  $\text{MgSO}_4$ , filtered through a celite cake, and rotary evaporated, and dried under vacuum to obtain a white solid. The crude product was recrystallized from hexane and dried under vacuum to obtain a white solid (4.362 g, 13.5 mmol, 72.7% yield).  $R_f = 0.5$  (hexane:EtOAc; 85:15).  $^1\text{H-NMR}(\text{CDCl}_3, 500 \text{ MHz})$ :  $\delta$  7.82 (d, 2 H, aromatic),  $\delta$  7.66 (d, 2 H, aromatic),  $\delta$  7.48 (d, 2 H, aromatic),  $\delta$  7.26 (d, 2 H, aromatic),  $\delta$  2.42 (s, 3 H, methyl).

**4-bromomethyl-4'-iodobenzophenone (9).** A mixture of **8** (3.096 g, 9.61 mmol), recrystallized N-bromosuccinimide (1.799 g, 10.10 mmol), and benzoyl peroxide (25 mg, 0.10 mmol) in CCl<sub>4</sub> (50 ml) was refluxed at ~150°C under argon for 3.5 h. The hot solution was filtered and rinsed with hot CCl<sub>4</sub> (20 ml) until the crystals became colorless. The filtrate was cooled to rt and filtered again to completely remove residual succinimide. The filtrate was rotary evaporated and dried under vacuum. The crude product was recrystallized from hexane and dried under vacuum to obtain a purplish white solid (2.736 g, 6.823 mmol, 70.9% yield). R<sub>f</sub> = 0.4 (hexane:EtOAc; 85:15). <sup>1</sup>H-NMR(CDCl<sub>3</sub>, 500 MHz): δ7.84 (d, 2 H, aromatic), δ7.50 (d, 2 H, aromatic), δ7.49 (d, 2 H, aromatic), δ7.52 (d, 2 H, aromatic), δ4.51 (s, 2 H).

**Ethyl α-acetamido-α-cyano-β-(4'-iodo-4-benzophenone)-DL-propionate (10).** A mixture of **9** (916 mg, 2.28 mmol), ethyl acetamidocyanoacetate (668 mg, 3.88 mmol), 18-crown-6 (70 mg), and K<sub>2</sub>CO<sub>3</sub> (1.09 g) in CH<sub>3</sub>CN (25 ml) was stirred at rt under argon for 3 h. The solution was filtered through a celite cake, concentrated, and dried under vacuum.

**4'-fluoro-p-benzoyl-phenylalanine (11).** The crude product **10** and 50 ml of a 1:1 solution of 8 M HCl and CF<sub>3</sub>COOH was refluxed with stirring at ~150 °C for 24 hours. The lingering CF<sub>3</sub>COOH was removed by blowing air into the reaction flask with stirring. The reaction mixture was lyophilized to collect the crude product. Lingering trifluoroacetate ion was exchanged for chloride ion by suspending the crude product in ~ 20 mL 1 M HCl and lyophilizing the resulting solution. The product was dissolved by the dropwise addition of 8 M NaOH to pH ~10. The solution was centrifuged to remove insoluble organics, and the clear solution was adjusted to pH ~7 by dropwise addition of 2 M HCl and the precipitate was collected and washed with cold water (2 x 10 mL). The remaining solid was dried under vacuum to obtain a white powder. <sup>1</sup>H-NMR DMSO: δ7.96 (d, aromatic, 2 H), δ7.65 (d, aromatic, 2 H), δ7.47 (dd, aromatic, 2 H), δ7.28 (bs, 2 H, NH<sub>2</sub>), δ3.43 (dd, 1 H, CHCH<sub>A</sub>CH<sub>B</sub>), δ3.22 (dd, 1 H, CHCH<sub>A</sub>CH<sub>B</sub>), δ3.0 (m, 1 H, CHCH<sub>2</sub>).

#### Synthesis of 4'-nitro-p-benzoyl-DL-phenylalanine (4nitro-Bpa)

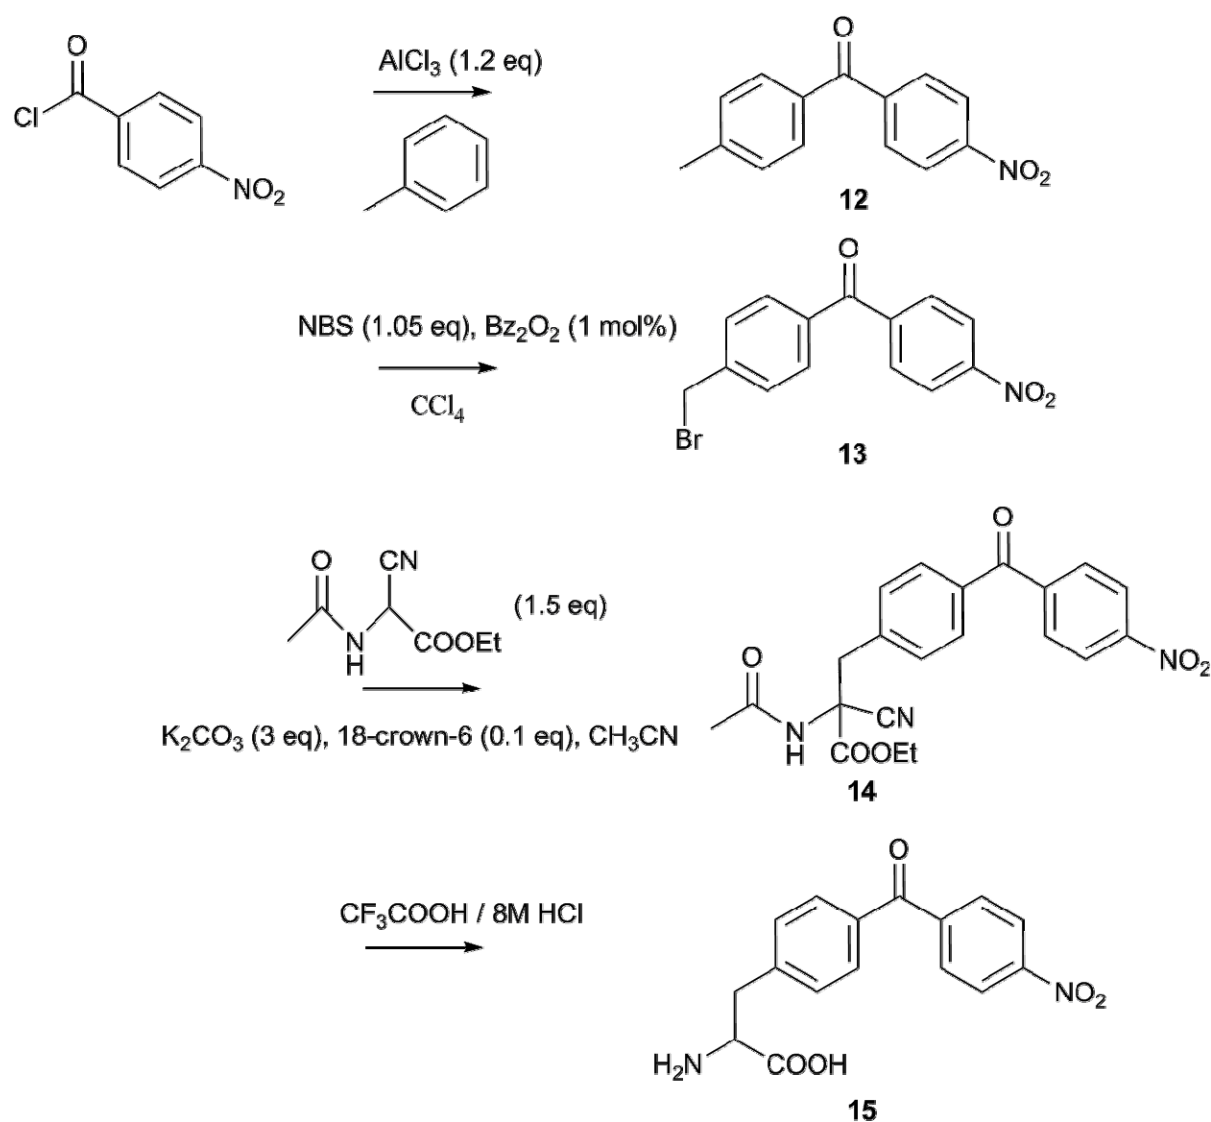

**4-methyl-4'-nitro-benzophenone (12).** Aluminum chloride (12.37 g, 92.78 mmol) was slowly added to a stirring solution of 4'-nitrobenzoyl chloride (14.13 g, 76.18 mmol) in toluene (75 mL). The solution was stirred at rt under argon for 1 h, then water was added dropwise to quench the reaction. The solution was further stirred for an additional 15 minutes before being washed with water (2 x 50 mL), 10% NaHCO<sub>3</sub> (2 x 50 mL), and brine (2 x 50 mL). The organic phase was dried with anhydrous MgSO<sub>4</sub>, filtered through a celite cake, and rotary evaporated, and dried under vacuum to obtain a yellow solid. The crude product was recrystallized from hexane and dried under vacuum to obtain a yellow solid (12.97 g, 53.8 mmol, 70.9% yield). R<sub>f</sub> = 0.4 (hexane:EtOAc; 85:15). <sup>1</sup>H-NMR (CDCl<sub>3</sub>, 500 MHz): δ 8.29 (d, 2 H, aromatic), δ 7.88 (d, 2 H, aromatic), δ 7.88 (d, 2 H, aromatic), δ 7.29 (d, 2 H, aromatic), δ 2.44 (s, 3 H, methyl).

**4-bromomethyl-4'-nitrobenzophenone (13).** A mixture of 12 (4.497 g, 18.66 mmol), recrystallized N-bromosuccinimide (3.487 g, 19.59 mmol), benzoyl peroxide (46.7 mg, 0.191 mmol) in CCl<sub>4</sub> (50 ml) was refluxed at ~150 °C under argon for 4 h. The hot solution was

filtered and rinsed with hot  $\text{CCl}_4$  (20 ml) until the crystals became colorless. The filtrate was cooled to rt and filtered again to completely remove residual succinimide. The filtrate was rotary evaporated and dried under vacuum. The crude product was recrystallized from hexane and dried under vacuum to obtain a yellow solid (5.079 g, 15.87 mmol, 85.0% yield).  $R_f = 0.3$  (hexane:EtOAc; 85:15).  $^1\text{H-NMR}$  ( $\text{CDCl}_3$ , 500 MHz):  $\delta$  8.34 (d, 2 H, aromatic),  $\delta$  7.93 (d, 2 H, aromatic),  $\delta$  7.79 (d, 2 H, aromatic),  $\delta$  7.52 (d, 2 H, aromatic),  $\delta$  4.52 (s, 2 H).

**Ethyl  $\alpha$ -acetamido- $\alpha$ -cyano- $\beta$ -(4'-nitro-4-benzophenone)-DL-propionate (14).** A mixture of **13** (3.95 g, 12.35 mmol), ethyl acetamidocyanoacetate (3.16 g, 18.58 mmol), 18-crown-6 (327 mg, 1.23 mmol), and  $\text{K}_2\text{CO}_3$  (5.17 g, 37.4 mmol) in  $\text{CH}_3\text{CN}$  (50 mL) was stirred at rt under argon for 14 h. The solution was filtered through a celite cake, concentrated, and dried under vacuum to obtain a greenish-black crude product (3.36 g).  $R_f = 0.15$  (hexane:EtOAc; 50:50).

**4'-nitro-*p*-benzoyl-DL-phenylalanine (15).** A mixture of crude protected **14** and 50 ml of a 1:1 solution of 8 M HCl and  $\text{CF}_3\text{COOH}$  was refluxed with stirring at 160 °C for 24 h. The reaction mixture was lyophilized to collect the crude product. Lingering trifluoroacetate ion was exchanged for chloride ion by suspending the crude product in ~ 50 mL 1 M HCl and lyophilizing the resulting solution. The product was dissolved in 50 mL of distilled water and dissolved by dropwise addition of 10% NaOH. The mixture was centrifuged to separate the free amino acid in the supernatant from the water-insoluble organic compounds. The pH of the solution was then adjusted to ~6 by the addition of 1 M HCl, and the precipitate was collected by centrifugation, washed with cold water (2 x 10 mL), and dried under high vacuum to obtain a yellow powder (2.93 g, 9.33 mmol, 75.5%).  $^1\text{H-NMR}$  DMSO:  $\delta$  7.92 (dd, aromatic, 2 H),  $\delta$  7.3 (d, aromatic, 2 H),  $\delta$  7.58 (d, aromatic, 2 H),  $\delta$  7.54 (dd, aromatic, 2 H),  $\delta$  8.5 (bs, 2 H,  $\text{NH}_2$ ),  $\delta$  3.27 (dd, 1 H,  $\text{CHCH}_\text{A}\text{CH}_\text{B}$ ),  $\delta$  3.14 (dd, 1 H,  $\text{CHCH}_\text{A}\text{CH}_\text{B}$ ),  $\delta$  4.25 (m, 1 H,  $\text{CHCH}_2$ ).

### Synthesis of 4'-nitro, 3'-fluoro-*p*-benzoyl-DL-phenylalanine (3F-4nitro-Bpa)



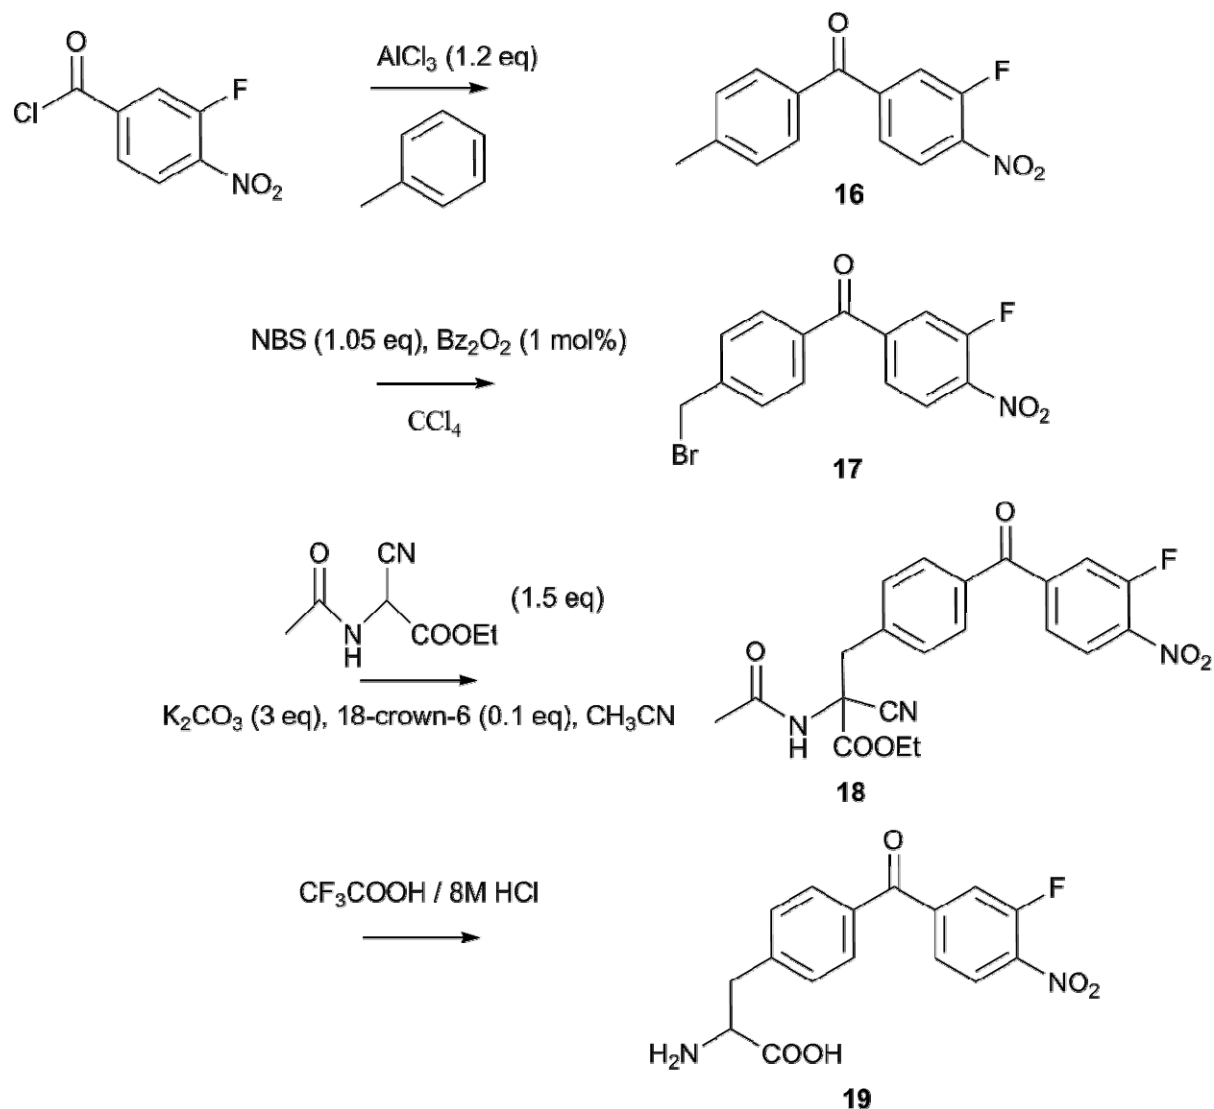

**4-methyl-4'-nitro-3'-fluorobenzophenone (16).** Aluminum chloride (0.90 g, 6.8 mmol) was added into a stirred solution of toluene (15 mL) and 4-nitro-3-fluorobenzoyl chloride (1.0 g, 5.2 mmol). The solution was stirred at rt under argon for 1 h, then 5 mL of water was added dropwise to quench the reaction. The solution was further stirred for an additional 15 minutes before being washed with water (2 x 50 mL), 10%  $\text{NaHCO}_3$  (2 x 50 mL), and brine (2 x 50 mL). The organic phase was dried with anhydrous  $\text{MgSO}_4$ , filtered through a celite cake, and rotary evaporated, and dried under vacuum to obtain a yellow solid. The crude product was dissolved in a minimum amount of  $\text{CH}_2\text{Cl}_2$  and hexane was added dropwise until precipitation occurred. The solution was then heated until precipitate redissolved, then cooled to rt and subsequently chilled to  $-20^\circ\text{C}$ . The crystals were triturated with cold hexane to obtain a yellow solid (1.10 g, 81 % yield).  $^1\text{H}$  NMR( $\text{CDCl}_3$ , 500 MHz):  $\delta$  8.15 (dd, aromatic, 2 H),  $\delta$  7.71 (d, aromatic, 2 H),  $\delta$  7.68 (m, aromatic, 1 H),  $\delta$  7.34 (d, aromatic, 2 H),  $\delta$  2.44 (s, methyl, 3 H).  $^{13}\text{C}$  NMR: carbonyl ( $\delta$  193.0), aromatic ( $\delta$  156.2, 154.2, 145.0, 144.5, 133.0, 130.5, 129.5, 126.1, 125.5, 121.5, 115.3), alkyl ( $\delta$  22.2).

**4-bromomethyl-4'-nitro-3'-fluorobenzophenone (17).** A mixture of **16** (1.1 g, 4.2 mmol), recrystallized N-bromosuccinimide (0.654 g), and benzoyl peroxide (60 mg) in CCl<sub>4</sub> (20 ml) was refluxed at ~150 °C under argon for 3 hours. The hot solution was filtered and rinsed with hot CCl<sub>4</sub> (20 ml) until the crystals became colorless. The filtrate was cooled to rt and filtered again to completely remove residual succinimide. The filtrate was rotary evaporated and dried under vacuum. The crude product was recrystallized from hexane and dried under vacuum (58% yield). <sup>1</sup>H NMR(CDCl<sub>3</sub>, 500 MHz): δ 8.18 (dd, aromatic, 2 H), δ 7.78 (d, aromatic, 2 H), δ 7.68 (m, aromatic, 1 H), δ 7.56 (d, aromatic, 2 H), δ 4.57 (s, methyl, 3 H). <sup>13</sup>C NMR(CDCl<sub>3</sub>): carbonyl (δ 192.4), aromatic (δ 156.2, 154.0, 146.7, 144.5, 144.4, 143.7, 143.6, 135.0, 133.0, 130.5, 126.5, 125.5, 119.7, 119.4), alkyl (δ 31.7). <sup>19</sup>F-NMR: δ -118.5 ppm.

**Ethyl α-acetamido-α-cyano-β-(4'-nitro-3'-fluoro-4-benzophenone)-DL-propionate (18).** A mixture of **17** (835 mg, 2.47 mmol), ethyl acetamidocyanoacetate (630 mg), 18-crown-6 (65 mg), and K<sub>2</sub>CO<sub>3</sub> (1.02 mg) in CH<sub>3</sub>CN (15 ml) was stirred at rt under argon for 3 h. The solution was filtered through a celite cake, concentrated, and dried under vacuum. The crude product was washed with hexane to remove brown impurities and dried under vacuum (95% yield). R<sub>f</sub> = 0.05 (hexane:EtOAc; 50:50). <sup>1</sup>H-NMR(CDCl<sub>3</sub>, 500 MHz): δ 8.18 (dd, aromatic, 2 H), δ 7.78 (d, aromatic, 2 H), δ 7.68 (m, aromatic, 1 H), δ 7.41 (d, aromatic, 2 H), δ 4.35 – 4.20 (m, 2 H, methylene of ethyl ester), δ 3.72 and δ 3.52 (dd, 2 H, hydrogens on C<sub>β</sub>), δ 3.62 (s, 3 H, methyl), δ 1.32 (doublet of triplets, 3 H, ester methyl). <sup>13</sup>C-NMR(CDCl<sub>3</sub>): carbonyl (δ 1942.5, 171.2, 170.0), (165.4, 136.7, 156.1, 154.0, 143.5, 138.1, 135.6, 130.4, 126.4, 125.5, 119.5, 115.7, 70.0, 60.4, 57.4, 22.7, 13.8). <sup>19</sup>F-NMR: δ -118.5 ppm.

**4'-nitro-3'-fluoro-p-benzoyl-phenylalanine (19).** A mixture of **18** (1.0 g) and 30 ml of a 1:1 solution of 8 M HCl and CF<sub>3</sub>COOH was refluxed with stirring at 180 °C for 18 hours. The reaction mixture was lyophilized to collect the crude product. Lingering trifluoroacetate ion was exchanged for chloride ion by suspending the crude product in ~ 20 mL 1 M HCl and lyophilizing the resulting solution. The product was dissolved in 1 M NaOH and filtered. The clear solution was adjusted to a pH of 7 by addition of 1 M HCl and the precipitate was collected and washed twice with cold water. The remaining yellow solid was dried under vacuum to obtain ~ 260 mg of a yellow powder. <sup>1</sup>H-NMR DMSO: δ 8.25 (t, aromatic, 1 H), δ 7.8 (d, aromatic, 1 H), δ 7.65 (m, aromatic, 3 H), δ 7.38 (dd, aromatic, 2 H), δ 3.55 (m, 1 H, CHCH<sub>2</sub>), δ 3.25 (dd, 1 H, CHCH<sub>A</sub>CH<sub>B</sub>), δ 3.25 (dd, 1 H, CHCH<sub>A</sub>CH<sub>B</sub>). <sup>13</sup>C-NMR: δ 192.9, 169.6, 155.3, 153.2, 144.2, 144.0, 138.8, 133.8, 130.0, 123.0, 126.7, 125.7, 119.0, 118.9, 55.0, 36.9. <sup>19</sup>F-NMR: δ -115.86 ppm. MS ES (cal 332.0) pos. ion 333.1, neg. ion 331.1.

### Mutant Construction

Using a tRNA-synthetase (RS) gene-complementary primer containing a site mutation (fig. 1) and a downstream reverse-complimentary primer (*pDuleRev*) to the *pDule* vector (5' – GGTCGACGGCGCTATTCAG – 3'), the back portion of the mutant gene was amplified using PCR. Similarly, using the reverse compliment of the mutagenic primer and a downstream primer (*pDuleFor*) complimentary to the vector (5' – CGTCACTGCGTCTTTTACTG – 3'), the front portion of the mutant gene was amplified. The amplification products were combined and amplified using overlap PCR with *pDuleRev* and *pDuleFor*. The full length product and a *pDule* vector were each digested with NcoI and SacI restriction enzymes, then ligated together to

complete the construction of the new RS construct in *pDule* vector. Genes were sequenced after mutation to confirm success.

Figure 1. Sequences of mutagenic primers (5' – 3') used to construct synthetase mutants.

| Synthetase            | Forward Sequence                       | Reverse Compliment Sequence           |
|-----------------------|----------------------------------------|---------------------------------------|
| Bpa RS A31V,<br>T158S | *                                      | *                                     |
| Bpa RS T158S          | GCAGGTTAATAGCAGTCATTATCTGGGCG          | CGCCAGATAATGACTGCTATTAACCTGC          |
| Bpa RS L162A          | CGAGTCATTATGCGGGCGTTGATG               | CATCAACGCCCGCATAATGACTCG              |
| Bpa RS V164A          | CATTATCTGGGCGCGGATGTTGCAG              | CTGCAACATCCGCGCCAGATAATG              |
| Nap RS V167A          | GCGTTGATGTTGCGGTTGGAGGGATGG            | CCATCCCTCCAACCGCAACATCAACGC           |
| Nap RS L32A           | GATGAAAAATCTGCTGCCATAGGTTTTGAACCAAGTGG | CCACTTGGTTCAAAACCTATGGCAGCAGATTTTCATC |
| Nap RS L32G           | GATGAAAAATCTGCTGGGATAGGTTTTGAAC        | GTTCAAAACCTATCCCAGCAGATTTTCATC        |
| Nap RS L32V           | GATGAAAAATCTGCTGTGATAGGTTTTGAACCAAGTGG | CCACTTGGTTCAAAACCTATCACAGCAGATTTTCATC |

\* Mutation identified by sequencing on one of the T158S constructs.
